# Supplementary material for: 3-APTES on Dendritic Fibrous Mesoporous Silica Nanoparticles for the pH-Controlled Release of Corrosion Inhibitors
Source: MDPI journal article supplement (doi:10.3390/nano13182543), 2023-09-11
Supplement: s1 [file s1]

# 3-APTES on Dendritic Fibrous Mesoporous Silica Nanoparticles for the pH Controlled Release of Corrosion Inhibitors

E. Marconi <sup>1,2,3</sup>, I. Luisetto <sup>4</sup>, G. Di Carlo <sup>5</sup>, M. P. Staccioli <sup>5</sup>, S. Tuti <sup>3</sup>, and L. Tortora <sup>1,2,3\*</sup>

<sup>1</sup> LASR3 Surface Analysis Laboratory Roma Tre, via della Vasca Navale 84, Rome, 00146, Italy

<sup>2</sup> National Institute for Nuclear Physics, INFN Roma, Tre via della Vasca Navale 84, Rome, 00146, Italy; eleonora.marconi@roma3.infn.it

<sup>3</sup> Department of Sciences, Roma Tre University, via della Vasca Navale 84, Rome, 00146, Italy; simonetta.tuti@uniroma3.it, luca.tortora@uniroma3.it

<sup>4</sup> Department of Energy Technologies, ENEA C.R. Casaccia DTE-PCU-IPSE, S.P. 081 Via Anguillarese 301, 00123 S.M. di Galeria, Rome, Italy; igor.luisetto@enea.it

<sup>5</sup> Institute for the Study of Nanostructured Materials, National Research Council (ISMN-CNR), Via Salaria km 29,3 Monterotondo, Rome, 00015, Italy; mariapaola.staccioli@ismn.cnr.it, gabriella.dicarlo@cnr.it

\* Correspondence: luca.tortora@uniroma3.it

**Table S 1:** Table with the release time before the drawing of the supernatant for the MSNP-based samples.

| SAMPLES: BTA-MSNP, BTA-fMSNP, MBT-MSNP, MBT-fMSNP |                |                      |                       |                       |                        |                        |                        |                     |
|---------------------------------------------------|----------------|----------------------|-----------------------|-----------------------|------------------------|------------------------|------------------------|---------------------|
| RELEASE TIME                                      | T <sub>0</sub> | T <sub>0</sub> +5min | T <sub>0</sub> +30min | T <sub>0</sub> +60min | T <sub>0</sub> +120min | T <sub>0</sub> +180min | T <sub>0</sub> +240min | T <sub>0</sub> +24h |

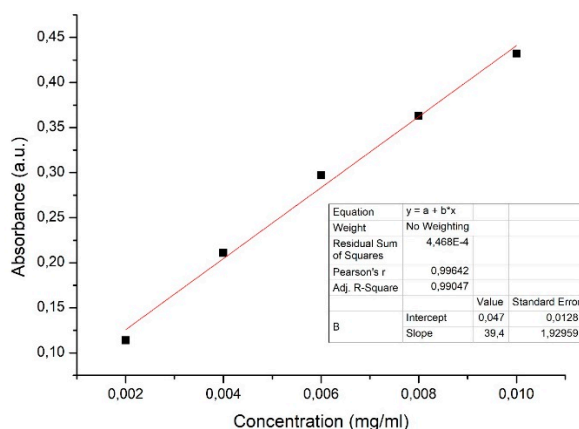

a)

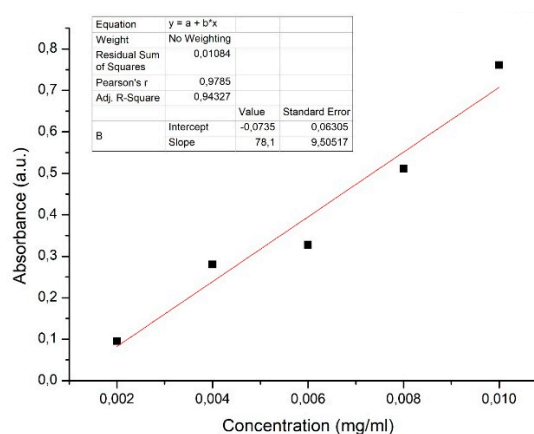

b)

**Figure S1:** UV-Vis calibration curve of BTA a) and MBT b).

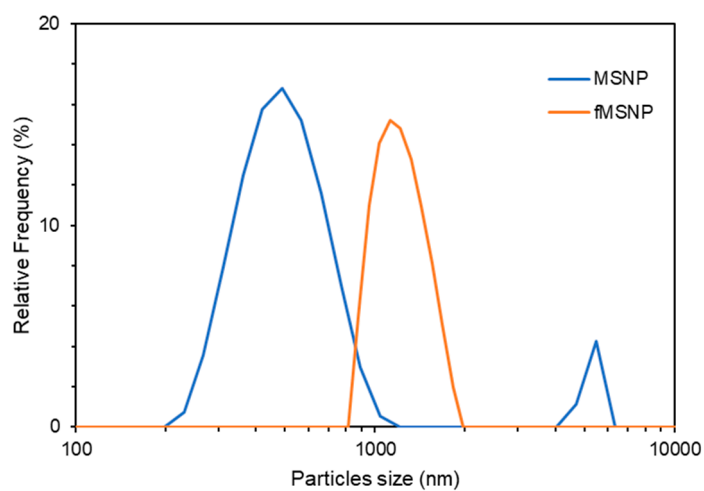

**Figure S2:** DLS measurement of MSNP and fMSNP.

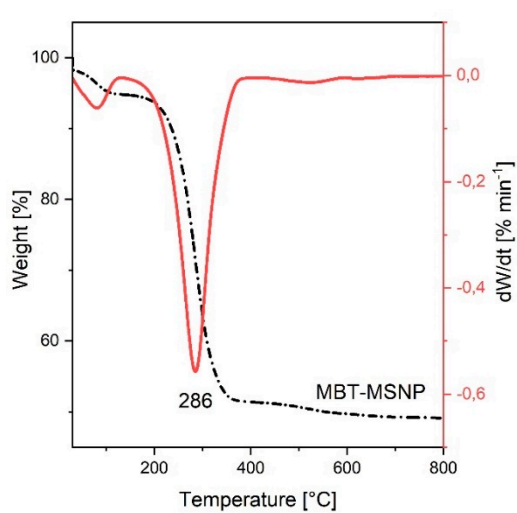

a)

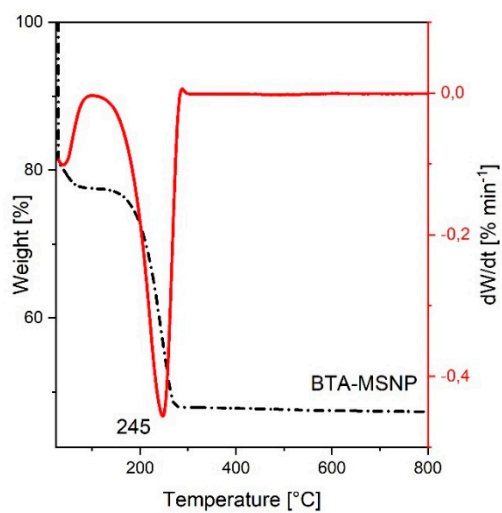

b)

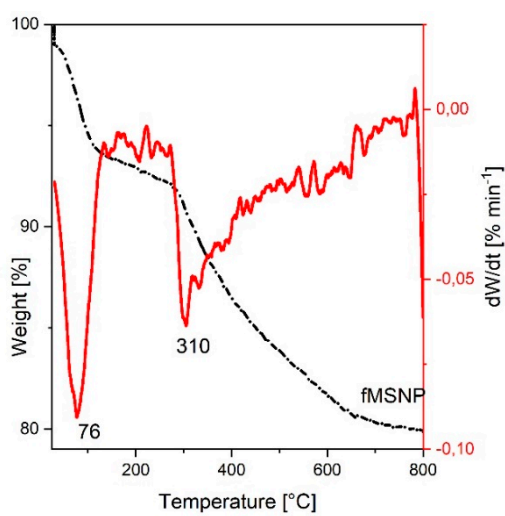

c)

**Figure S3:** TGA (dash line) and DTG (solid line) of a) MBT-MSNP b) BTA-MSNP, and c) fMSNP.

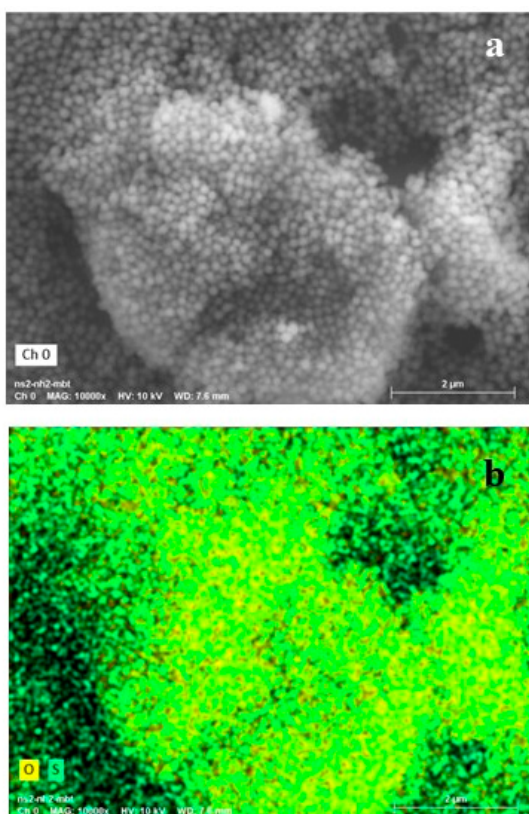

**Figure S4:** SEM-EDS analysis of MBT-fMSNPs: a) SEM image b) EDS oxygen - sulphur overlapped maps.

**Table S2:** Functional groups and mode of vibration from ATR-FTIR spectra of all samples

| Sample     | Wave number (cm <sup>-1</sup> ) | Vibration type            | Assignment                      |
|------------|---------------------------------|---------------------------|---------------------------------|
| MSNP       | 1100-1049                       | Stretching                | n <sub>s</sub> Si-O-Si          |
|            | 806                             | Stretching                | n <sub>as</sub> Si-O-Si         |
| fMSNP      | 1479; 1566                      | Bending                   | dNH <sub>2</sub>                |
|            | 2871                            | Stretching                | n <sub>s</sub> CH <sub>2</sub>  |
|            | 2934                            | Stretching                | n <sub>as</sub> CH <sub>2</sub> |
| MBT        | 567; 600                        | Aromatic ring torsion     | Aromatics                       |
|            | 665                             | Stretching                | nC-S                            |
|            | 750                             | Wagging                   | wCH and wNH                     |
|            | 1010 - 1075                     | Stretching                | nC-S in the S-C-S               |
|            | 1281; 1319; 1238                | Stretching                | nC-N                            |
|            | 1423                            | Stretching                | nC-C                            |
|            | 1597                            | Bending                   | dNH                             |
|            | 3111 – 2835                     | Stretching                | nN-H                            |
| MBT- MSNP  | 567; 600                        | Aromatic ring torsion     | Aromatics                       |
|            | 665                             | Stretching                | nC-S                            |
|            | 750                             | Wagging                   | wC-H                            |
|            | 1319 - 1238                     | Stretching                | nC-N                            |
|            | 1423                            | Stretching                | nC-C                            |
|            | 1597                            | Bending                   | dN-H                            |
| MBT- fMSNP | 3100-2800                       | Stretching                | nN-H                            |
|            | 750; 725                        | Stretching                | nC-S                            |
|            | 1479; 1566                      | Bending                   | dNH <sub>2</sub>                |
| BTA        | 778                             | In plane bending          | d N-H                           |
|            | 1006; 740                       | out-of-plane bending      | g C-H                           |
|            | 1206                            | triazole ring vibration   | aromatics                       |
|            | 1264                            | Stretching                | nC-N                            |
|            | 1382; 1420                      | triazole ring deformation | aromatics                       |
|            | 1457; 1511                      | benzene ring deformation  | aromatics                       |
|            | 1623; 1077                      | Bending                   | dNH                             |
|            | 3078-3032                       | Stretching                | nCH                             |
| BTA- MSNP  | 3400-3200                       | Stretching                | nNH                             |
|            | 778-740                         | out-of-plane bending      | g C-H                           |
|            | 1206                            | triazole ring vibration   | aromatics                       |
| BTA- fMSNP | 1382                            | triazole ring deformation | aromatics                       |
|            | 778                             | In plane bending          | d N-H                           |
|            | 740                             | out-of-plane bending      | g C-H                           |
|            | 1206                            | triazole ring vibration   | aromatics                       |
|            | 1382-1457                       | Bending                   | dNH <sub>2</sub>                |
|            | 1479; 1566                      | Bending                   | dNH <sub>2</sub>                |
